# Supplementary material for: Alkali metal reduction of 1,3,2-diazaborol and 1,3,2-diazagermol derivatives based on 1,2-bis[(2,6-diisopropylphenyl)imino]acenaphthene
Source: Royal Society of Chemistry journal article supplement (doi:10.1039/c9dt04652f), 2020-01-01
Supplement: c9dt04652f1.pdf [file c9dt04652f1.pdf]

## Alkali Metal Reduction of 1,3,2-Diazaborol and 1,3,2-Diazagermol Derivatives Based on 1,2-Bis[(2,6-diisopropylphenyl)imino]acenaphthene

Daria A. Lukina,<sup>a</sup> Alexandra A. Skatova,<sup>a</sup> Anton N. Lukoyanov,<sup>a</sup> Ekaterina A. Kozlova<sup>a</sup> and Igor L. Fedushkin\*<sup>a</sup>  
G. A. Razuvaev Institute of Organometallic Chemistry of the Russian Academy of Sciences, Tropinina Str. 49,  
Nizhny Novgorod 603137, Russian Federation

**X-ray crystallography.** The X-ray data for **3**, **4** and **8** were collected at 100(2) K on a Bruker AXS D8 Quest Photon and Agilent Xcalibur E (MoK $\alpha$ -radiation,  $\omega$ -scan technique,  $\lambda = 0.71073 \text{ \AA}$ ). The structures were solved by direct methods and were refined by full-matrix least squares on  $F^2$  using SHELXTL [Sheldrick G.M. (2014). SHELXTL v. 2014/7, Structure Determination Software Suite, Bruker AXS, Madison, Wisconsin, USA]. All hydrogen atoms were placed in calculated positions and were refined in the riding model. SCALE3 ABSPACK [SCALE3 ABSPACK: Empirical absorption correction, CrysAlisPro Software Package Agilent Technologies, 2012] for **3**, **8** and SADABS [Sheldrick G.M. (2012). SADABS v.2012/1, Bruker/Siemens Area Detector Absorption Correction Program, Bruker AXS, Madison, Wisconsin, USA] for **4** were used to perform area-detector scaling and absorption corrections. Crystallographic data and structural refinement details are given in Table 1. CCDC 1957529 (**3**), 1957531 (**4**), 1957530 (**8**) contain the supplementary crystallographic data for this paper. These data can be obtained free of charge from The Cambridge Crystallographic Data Centre via [www.ccdc.cam.ac.uk/data\\_request/cif](http://www.ccdc.cam.ac.uk/data_request/cif).

**Table 1.** Crystal Data and Structure Refinement Details for Compounds **3**, **4** and **8**.

|                                                                                      | <b>3</b> · 0.875 C <sub>10</sub> H <sub>8</sub>                                                                  | <b>4</b>                                                                                    | <b>8</b>                                                          |
|--------------------------------------------------------------------------------------|------------------------------------------------------------------------------------------------------------------|---------------------------------------------------------------------------------------------|-------------------------------------------------------------------|
| Formula                                                                              | C <sub>96.75</sub> H <sub>127</sub> B <sub>2</sub> Br <sub>2</sub> Li <sub>4</sub> N <sub>4</sub> O <sub>4</sub> | C <sub>79</sub> H <sub>88</sub> B <sub>2</sub> K <sub>2</sub> N <sub>4</sub> O <sub>2</sub> | C <sub>48</sub> H <sub>71</sub> GeN <sub>2</sub> NaO <sub>6</sub> |
| Formula weight                                                                       | 1619.22                                                                                                          | 1225.35                                                                                     | 867.64                                                            |
| Temperature/K                                                                        | 100(2)                                                                                                           | 100(2)                                                                                      | 100(2)                                                            |
| Crystal system                                                                       | Triclinic                                                                                                        | Tetragonal                                                                                  | Orthorhombic                                                      |
| Space group                                                                          | P-1                                                                                                              | I-4                                                                                         | P2(1)2(1)2(1)                                                     |
| <i>a</i> /Å                                                                          | 13.2924(4)                                                                                                       | 33.394(3)                                                                                   | 12.205(3)                                                         |
| <i>b</i> /Å                                                                          | 14.4434(3)                                                                                                       | 33.394(3)                                                                                   | 19.4474(18)                                                       |
| <i>c</i> /Å                                                                          | 24.8139(7)                                                                                                       | 12.3370(9)                                                                                  | 20.653(6)                                                         |
| $\alpha$ /deg                                                                        | 101.192(2)                                                                                                       | 90                                                                                          | 90                                                                |
| $\beta$ /deg                                                                         | 102.617(2)                                                                                                       | 90                                                                                          | 90                                                                |
| $\gamma$ /deg                                                                        | 91.829(2)                                                                                                        | 90                                                                                          | 90                                                                |
| <i>V</i> /Å <sup>3</sup>                                                             | 4546.7(2)                                                                                                        | 13758(2)                                                                                    | 4902.1(18)                                                        |
| <i>Z</i>                                                                             | 2                                                                                                                | 8                                                                                           | 4                                                                 |
| density/g/cm <sup>3</sup>                                                            | 1.183                                                                                                            | 1.183                                                                                       | 1.176                                                             |
| $\mu$ /mm <sup>-1</sup>                                                              | 0.942                                                                                                            | 0.187                                                                                       | 0.679                                                             |
| <i>F</i> (000)                                                                       | 1719                                                                                                             | 5232                                                                                        | 1856                                                              |
| Crystal size /mm                                                                     | 0.700 × 0.435 × 0.330                                                                                            | 0.350 × 0.250 × 0.200                                                                       | 0.510 × 0.270 × 0.110                                             |
| $\theta$ -range/deg                                                                  | 3.038–26.000                                                                                                     | 0.862–24.999                                                                                | 3.556–25.999                                                      |
| Index ranges                                                                         | –16 ≤ <i>h</i> ≤ 16<br>–17 ≤ <i>k</i> ≤ 17<br>–30 ≤ <i>l</i> ≤ 30                                                | –39 ≤ <i>h</i> ≤ 38<br>–20 ≤ <i>k</i> ≤ 39<br>–14 ≤ <i>l</i> ≤ 14                           | –15 ≤ <i>h</i> ≤ 13<br>–22 ≤ <i>k</i> ≤ 23<br>–15 ≤ <i>l</i> ≤ 25 |
| Reflections collected                                                                | 73871                                                                                                            | 38965                                                                                       | 17664                                                             |
| Independent reflections                                                              | 17853 [ <i>R</i> <sub>int</sub> = 0.0719]                                                                        | 12049 [ <i>R</i> (int) = 0.0594]                                                            | 9511 [ <i>R</i> <sub>int</sub> = 0.0424]                          |
| Goodness-of-fit on $F^2$                                                             | 1.004                                                                                                            | 1.018                                                                                       | 1.011                                                             |
| <i>R</i> <sub>1</sub> / <i>wR</i> <sub>2</sub> ( <i>I</i> > 2 $\sigma$ ( <i>I</i> )) | 0.0551 / 0.1285                                                                                                  | 0.0658 / 0.1604                                                                             | 0.0478 / 0.0906                                                   |
| <i>R</i> <sub>1</sub> / <i>wR</i> <sub>2</sub> (all parameters)                      | 0.0997 / 0.1456                                                                                                  | 0.0959 / 0.1753                                                                             | 0.0733 / 0.0995                                                   |
| Largest diff peak/hole [e Å <sup>-3</sup> ]                                          | 0.880 / –0.848                                                                                                   | 0.808 / –0.293                                                                              | 0.306 / 0.303                                                     |

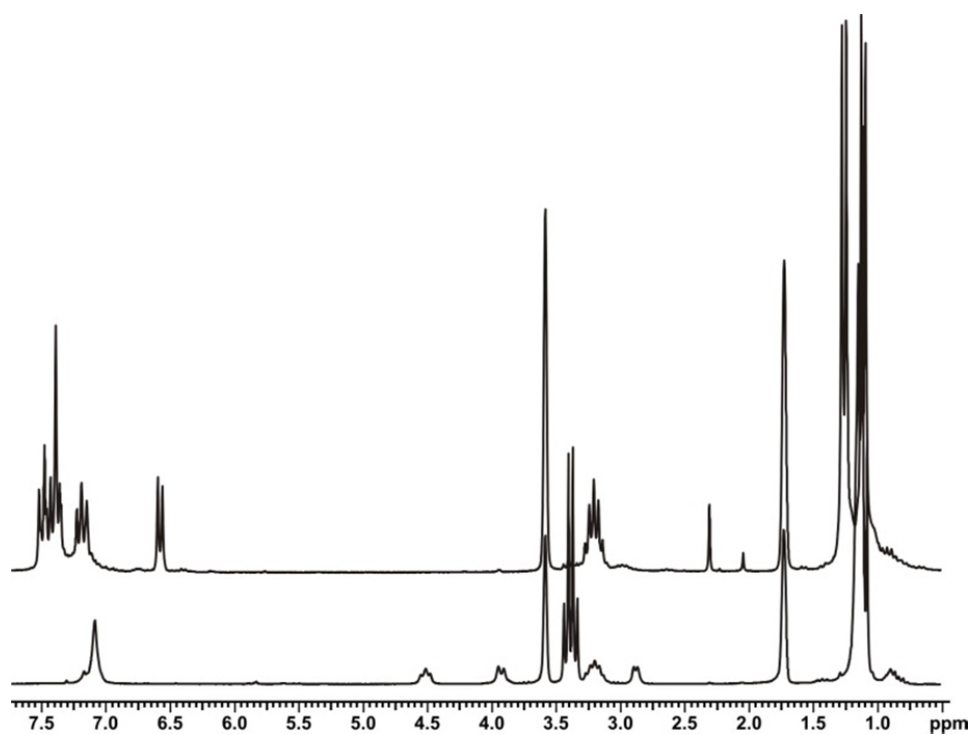

**Figure 1S.**  $^1\text{H}$  NMR spectra of the compounds **1** (top) and **3** (bottom) (200 MHz, 300 K,  $\text{thf-d}_8$ ).

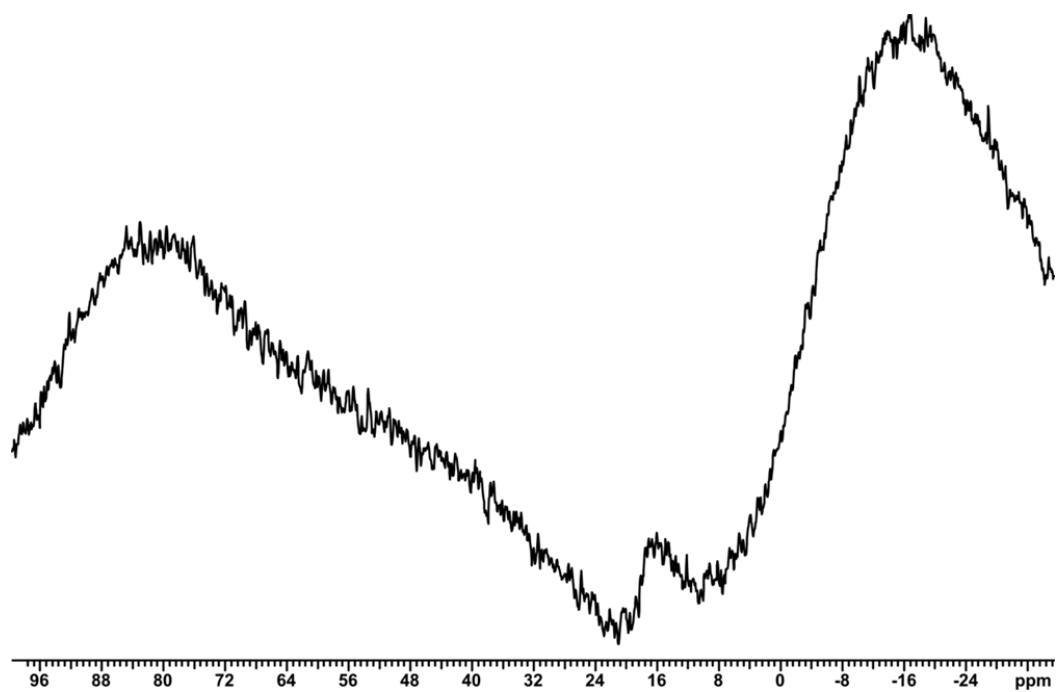

**Figure 2S.**  $^{11}\text{B}$  NMR spectrum of the compound **3** (64.21 MHz, 300 K,  $\text{thf-d}_8$ ).

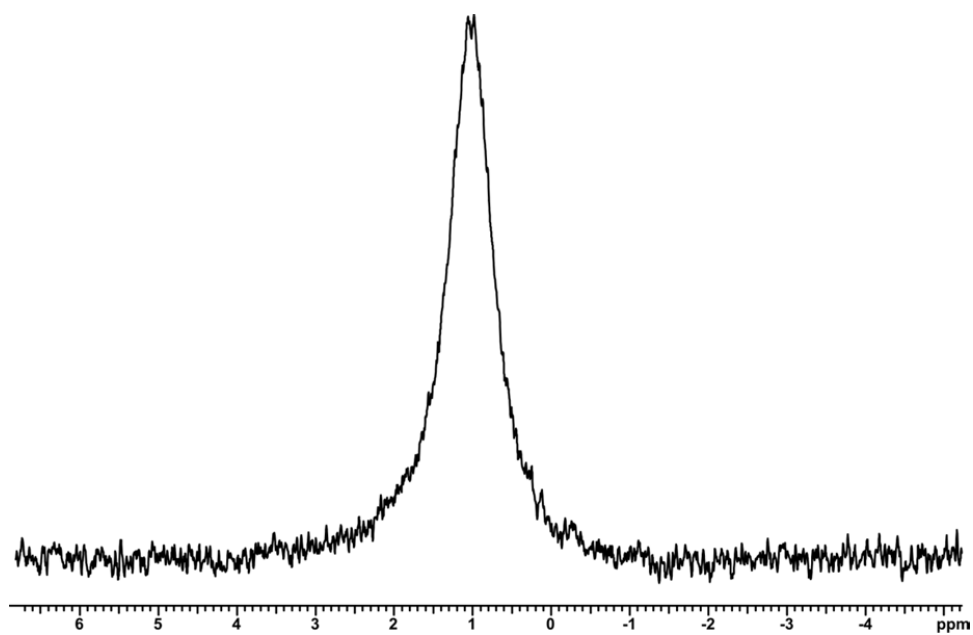

**Figure 3S.**  $^7\text{Li}$  NMR spectrum of the compound **3** (77.78 MHz, 300 K, thf- $d_8$ ).

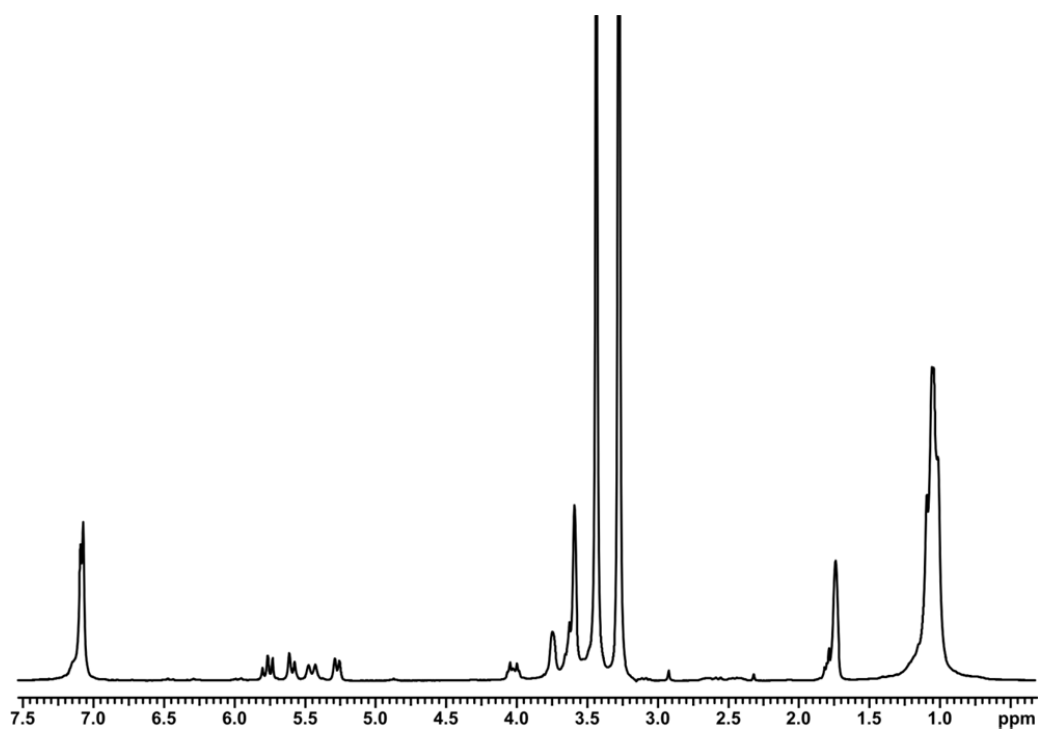

**Figure 4S.**  $^1\text{H}$  NMR spectrum of the compound **6** (200 MHz, 298 K, thf- $d_8$ )

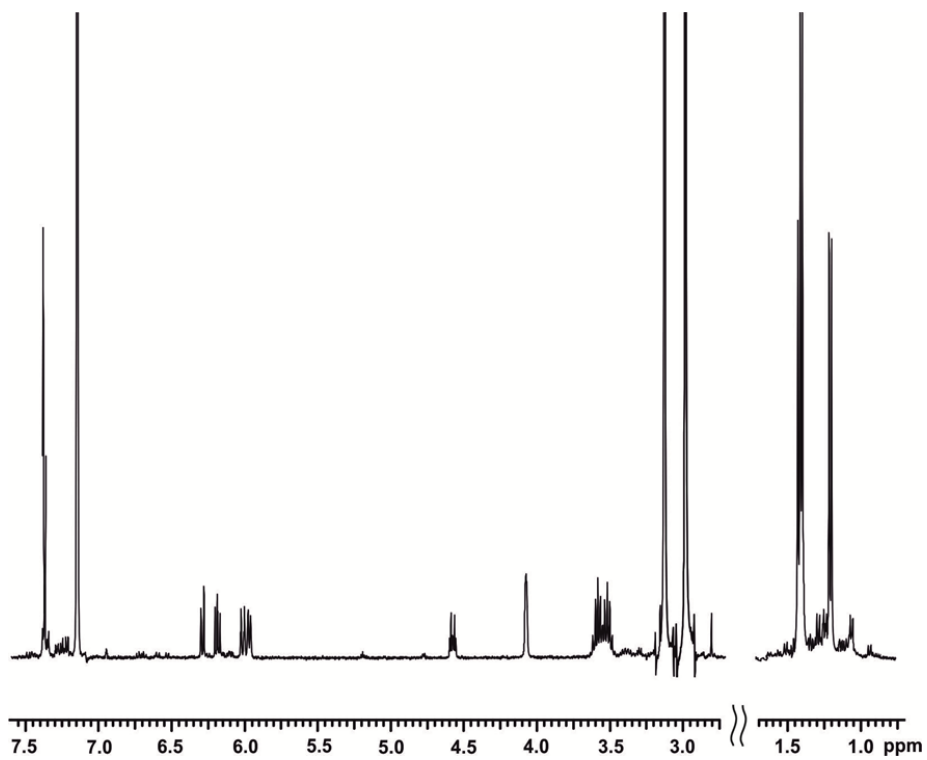

**Figure 5S.**  $^1\text{H}$  NMR spectrum of the compound **8** (400 MHz, 296 K,  $\text{C}_6\text{D}_6$ )

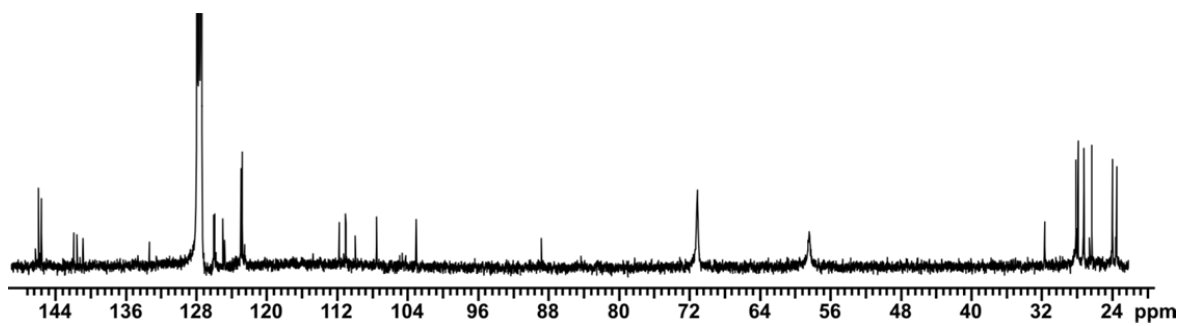

**Figure 6S.**  $^{13}\text{C}$  NMR spectrum of the compound **8** (100 MHz, 296 K,  $\text{C}_6\text{D}_6$ )

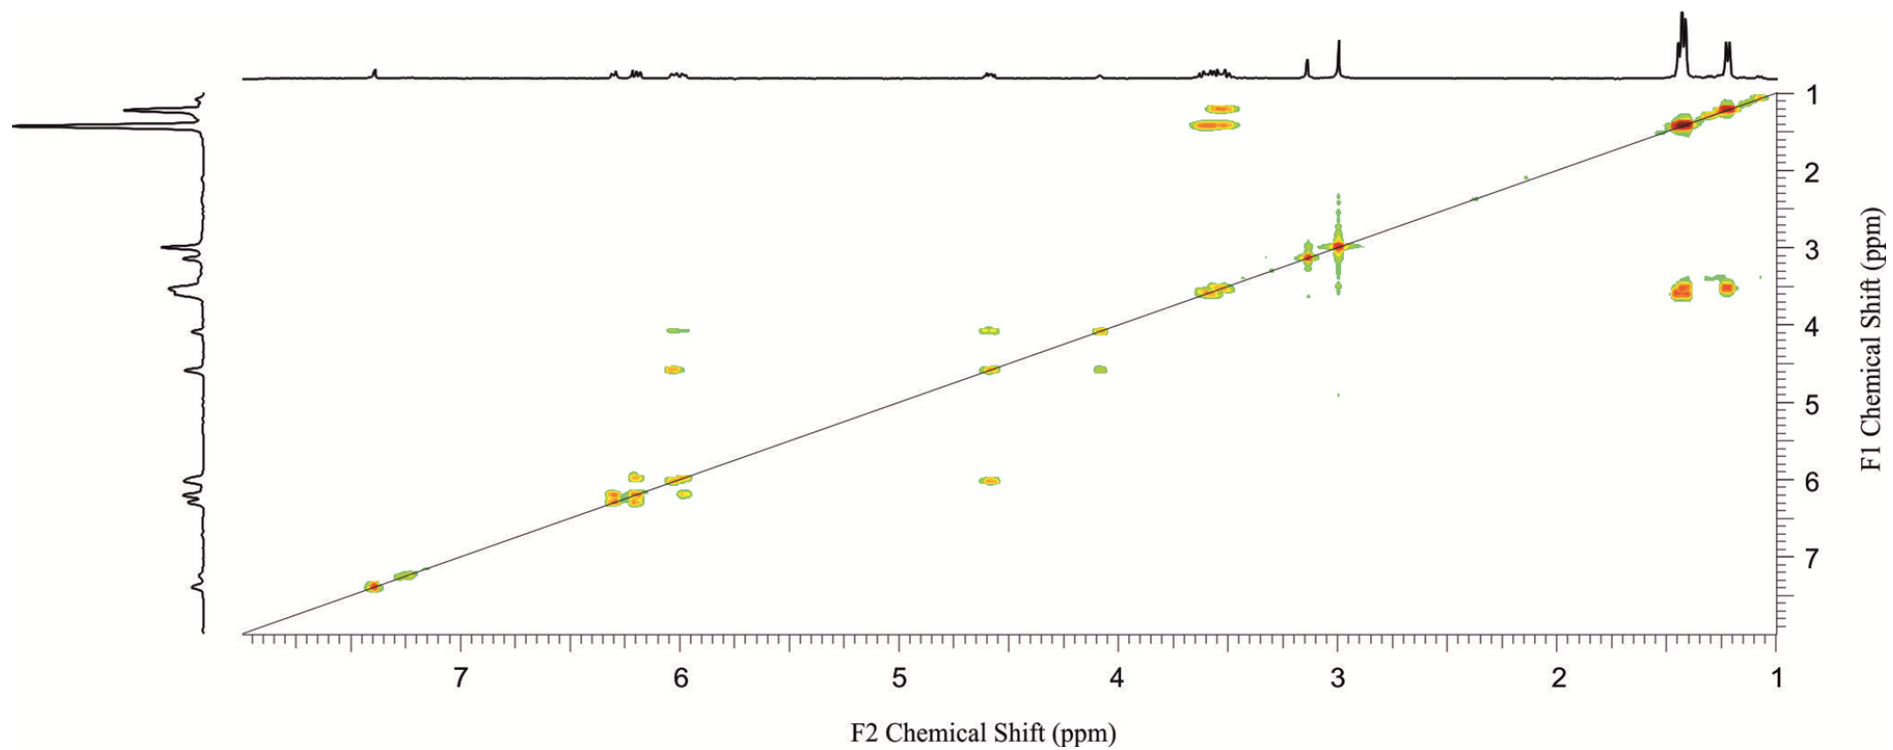

**Figure 7S.**  $^1\text{H}$ - $^1\text{H}$  COSY spectrum of **8** (400 MHz, 296 K,  $\text{C}_6\text{D}_6$ ).
